# Supplementary material for: New prognostic models in glioblastoma: based ferroptosis-related genes and immune scores
Source: Research Square preprint supplement (doi:10.21203/rs.3.rs-554142/v1), 2021-05-28
Supplement: Supplementary file 3 [file ae125142f8246b82fa93bb55.docx]

Table4 **Results of GO and KEGG analyses**

| **GO** | Description | p.adjust | Count |
| --- | --- | --- | --- |
| BP | response to oxidative stress | 2.51E-06 | 9 |
| BP | regulation of cholesterol biosynthetic process | 2.51E-06 | 5 |
| BP | regulation of sterol biosynthetic process | 2.51E-06 | 5 |
| BP | cellular response to chemical stress | 4.59E-06 | 8 |
| BP | regulation of cholesterol metabolic process | 5.80E-06 | 5 |
| BP | cholesterol biosynthetic process | 8.57E-06 | 5 |
| BP | secondary alcohol biosynthetic process | 8.57E-06 | 5 |
| BP | sterol biosynthetic process | 1.05E-05 | 5 |
| BP | regulation of alcohol biosynthetic process | 1.05E-05 | 5 |
| BP | cellular response to oxidative stress | 1.56E-05 | 7 |
| BP | regulation of steroid biosynthetic process | 2.10E-05 | 5 |
| BP | regulation of lipid biosynthetic process | 2.79E-05 | 6 |
| BP | negative regulation of apoptotic signaling pathway | 5.16E-05 | 6 |
| BP | regulation of steroid metabolic process | 7.03E-05 | 5 |
| BP | regulation of apoptotic signaling pathway | 7.23E-05 | 7 |
| BP | regulation of small molecule metabolic process | 0.000124844 | 7 |
| BP | neutrophil chemotaxis | 0.004599 | 5 |
| BP | neutrophil migration | 0.007134 | 5 |
| BP | cell chemotaxis | 0.007134 | 7 |
| BP | myeloid leukocyte migration | 0.007804 | 6 |
| BP | antimicrobial humoral response | 0.007804 | 5 |
| BP | leukocyte chemotaxis | 0.007952 | 6 |
| CC | collagen-containing extracellular matrix | 0.003286 | 8 |
| CC | laminin complex | 0.027496 | 2 |
| CC | specific granule lumen | 0.027496 | 3 |
| CC | specific granule | 0.031921 | 4 |
| CC | anchored component of membrane | 0.032618 | 4 |
| MF | disordered domain specific binding | 0.014728272 | 2 |
| MF | ligase activity | 0.017031003 | 3 |
| MF | NADP binding | 0.026364762 | 2 |
| MF | transferase activity, transferring acyl groups | 0.049870532 | 3 |
| **KEGG** |  |  |  |
|  | Ferroptosis | 2.22E-11 | 8 |
|  | Fatty acid metabolism | 0.020819 | 3 |
|  | cytokine-cytokine receptor interaction | 0.020819 | 3 |
|  | Fluid shear stress and atherosclerosis | 0.020819 | 4 |
|  | Fatty acid biosynthesis | 0.025181 | 2 |
|  | Hepatocellular carcinoma | 0.025181 | 4 |
|  | Steroid biosynthesis | 0.025181 | 2 |
|  | MicroRNAs in cancer | 0.029446 | 5 |
